# Supplementary material
Source: publisher site journal article supplement (https://www.spandidos-publications.com/2010/downloadSupplementary)
Supplement: Supplementary file 1 [file downloadSupplementary]

## Sheet: I-H-O
Table SV: IgAN‑specifc peptides
Peptide	MW	m/z	Quality	Significance	Avg. ppm	Theoretical pI	Accession	PTM	IgAN	Healthy	Others	IgAN/Con	IgAN/Others	IgAN/Con, P	IgAN/Other, P	Sample Profile (Ratio)	HPSN 102	HPSN 104	HPSN 110	HPSN 111	HPSN 2	HPSN 80	LN 123	LN 21	LN 218	LN 59	LN 60	LN 61	MCD 19	MCD 27	MCD 30	MCD 35	MCD 39	MCD 40	IgAN 1	IgAN 124	IgAN 13	IgAN 139	IgAN 15	IgAN 16	IgAN 171	IgAN 193	IgAN 194	IgAN 28	IgAN 32	IgAN 33	IgAN 358	IgAN 360	IgAN 4
PVPAL	495.62	496.32	0.04	60	3.7	5.96	sp|O95714|HERC2_HUMAN		0	1875.45	845.556	0	0	3.24076e-06	0.0494896	0.72:0.76:0:0:0:0:0:1.40:0:1.00:0:0:0:0:0:0:0:0:0:0:0:0:0:0:0:0:0:0:0:0:0:0:0:0:0:0:0.55:0.79:0.47:0.84:0.57:0.68:0.90:0.47:0:0	2820	2970	0	0	0	0	0	5500	0	3930	0	0	0	0	0	0	0	0	0	0	0	0	0	0	0	0	0	0	0	0	0	0	0
RPPTPTLSLKPTPPAPVRLSPA	2293.74	765.136	0.08	4.41	7.5	12.01			424.612	3747.82	1563	0.113296	0.271665	0.0124066	0.0492929	0:1.48:0.37:0:0:2.29:2.34:0.23:5.54:1.00:0.10:0.21:0:0.20:1.63:0.46:2.96:0:0:0:0.44:0:0:0.24:0:1.02:0.30:0:0.50:0.33:0.02:0:0:1.68:0.31:0:0:0:0:2.41:0:3.66:0.32:6.31:4.73:10.14	0	2210	555	0	0	3430	3500	341	8280	1490	156	316	0	297	2440	689	4430	0	0	0	657	0	0	354	0	1530	450	0	747	490	23.4	0	0
FTSSTSYNRGDSTFESKSYKMA	2494.67	624.284	0.21	60	4.9	8.43	sp|P02671|FIBA_HUMAN		6546.47	0	19655.6	#DIV/0!	0.33306	0.00641634	0.048815	1.00:1.86:1.14:0.20:0.05:0.12:0.14:0:1.05:0:0.29:0:2.80:0.65:0.28:0.33:2.26:4.25:0.85:0.42:0:1.07:0.19:0:0:0:0:0.31:0.12:0.45:0.23:0.78:0.21:0:0.53:0:0:0:0:0:0:0:0:0:0:0	21600	40000	24500	4300	1040	2680	3040	0	22600	0	6220	0	60400	14000	6080	7040	48600	91700	18400	9030	0	23100	4160	0	0	0	0	6650	2480	9780	4900	16900	4590
SEKVKKAKAKSRIKMKKARKILAEKRAA	3196.98	1066.02	0.16	60	7.2	11.29			10670	0	4072.38	#DIV/0!	2.62009	0.00601293	0.0487025	1.00:0:0.58:1.07:2.91:0.89:3.67:0.83:0:0:0:0:0.01:0:0:0.39:0:0:4.65:2.04:0:0.65:0:0:2.15:4.04:5.04:1.71:2.74:0:1.21:0:3.90:0:0:0:0:0:0:0:0:0:0:0:0:0	6450	0	3720	6930	18800	5750	23700	5330	0	0	0	0	92.9	0	0	2530	0	0	30000	13200	0	4170	0	0	13800	26100	32500	11000	17700	0	7820	0	25100
TNDTN(+.98)GYSSGGGGHSPSAD	1781.68	594.564	0.16	60	4.1	4.2		Deamidation (NQ)	1211.76	0	3792.78	#DIV/0!	0.319493	0.0327467	0.0485744	1.00:1.38:0.43:0.31:0.27:0.68:0:0:0.52:0:0.36:0:0:0.32:0:0:0:0.19:0.46:0:0:0.20:0.21:0:0:0.17:0:0.15:0.11:0:0:0.34:0:0:0:0:0:0:0:0:0:0:0:0:0:0	12500	17300	5380	3870	3340	8490	0	0	6530	0	4500	0	0	3950	0	0	0	2410	5810	0	0	2540	2590	0	0	2190	0	1860	1360	0	0	4250	0
RRLRN(+.98)LGQPV	1209.41	1209.72	0.04	60	10.7	12.3		Deamidation (NQ)	350.647	0	84.5778	#DIV/0!	4.14585	0.0121824	0.0484849	0:0:0:0:0:0:1.00:0:0:0:0:0:0:0:15.48:0:0:0:0:4.33:17.07:2.78:10.08:0:7.13:0.81:2.39:4.96:0:5.29:2.32:0:0:0:7.31:0:0:0:0:0:0:0:0:0:0:0	0	0	0	0	0	0	92.4	0	0	0	0	0	0	0	1430	0	0	0	0	400	1580	257	932	0	659	75	221	458	0	489	215	0	0
AIVGIGGGGGLLLLVIVAVLIAYKRKSR	2807.51	702.429	0.02	5.22	6.6	11.1			70	1747.64	1103.33	0.0400541	0.0634441	0.00963327	0.0482521	0:0:0:1.00:0:0:0:0:1.76:0:0:0:0.35:0.92:1.33:0:0:0:0:0:0:0:0.32:0:0:0:0:0:0:0:0:0:0:0:0:2.12:0:0.45:1.29:0:0.32:0.28:0:0:0.16:0.57	0	0	0	3710	0	0	0	0	6510	0	0	0	1300	3400	4940	0	0	0	0	0	0	0	1190	0	0	0	0	0	0	0	0	0	0
EEHGIDLAGSDRGASALQLE	2068.18	690	0.12	60	4.8	4.17			3366.47	0	1339.44	#DIV/0!	2.51333	0.00337754	0.0478461	0:0:0:0:0:0:1.00:2.00:0:0:0:0:1.31:0:1.37:1.96:0:0:1.22:0.96:0:0:0:0:0:1.51:0:1.53:1.82:2.97:1.76:1.77:1.21:0:3.40:0:0:0:0:0:0:0:0:0:0:0	0	0	0	0	0	0	3150	6320	0	0	0	0	4130	0	4330	6180	0	0	3860	3020	0	0	0	0	0	4770	0	4830	5740	9370	5550	5570	3820
LRGPHLAKLELIRRLRSQ(+.98)	2157.59	719.781	0.06	5.39	6.3	12		Deamidation (NQ)	200	3024	1081.61	0.0661376	0.184909	3.74076e-05	0.0471836	1.00:0:0:0:0:1.47:1.05:0:0.18:0:0.67:0.05:0:1.20:0:0.15:0:1.85:0:0:0:0:0:0:0:0:0:0:0:0:1.33:0:0:0:0:0.67:2.11:1.49:0.35:0.41:0.79:0.52:0.97:0.68:2.40:2.61	2560	0	0	0	0	3760	2680	0	455	0	1700	129	0	3070	0	385	0	4730	0	0	0	0	0	0	0	0	0	0	0	0	3400	0	0
HPGSSFLKKTSKKL	1557.86	779.467	0.1	3.69	9.9	10.48			963.529	2617.45	3509.44	0.368117	0.274553	0.0149943	0.046942	0:0:0.02:0:0.04:0.62:0:0.15:0:1.00:0.63:0:0:0.18:1.31:0.91:0.76:0.03:0.40:0:0.11:0:0.32:0:0:0:0.38:0:0.16:0.10:0:0:0:0:0:0.35:0.08:0.21:0.45:0.31:0.50:0.05:0.19:0.20:0.16:0.06	0	0	241	0	452	6970	0	1650	0	11200	7020	0	0	1970	14600	10200	8510	357	4460	0	1250	0	3560	0	0	0	4250	0	1750	1110	0	0	0
VKVFSLAVNLIAID	1501.83	751.452	0.04	5.43	8.8	5.81	sp|P01024|CO3_HUMAN		225.118	4163.27	2200.56	0.0540723	0.1023	0.0470094	0.0465398	3.43:0:1.79:0:0:0:0:0.43:0.44:1.00:0.42:1.40:0.25:0:0:0:0:0:0:0:0.38:0:0:0.34:0:0:0:0.17:0:0:0:0:0:0:0:0.56:0:0.15:5.71:0.32:0.48:3.11:0:0:0.11:0.13	14800	0	7740	0	0	0	0	1850	1900	4330	1840	6050	1100	0	0	0	0	0	0	0	1630	0	0	1460	0	0	0	737	0	0	0	0	0
LKKFQVT	863.07	863.535	0.01	60	5.2	10			0	245.327	97	0	0	0.000365717	0.0457877	0:0:0.67:0:0:0:0:0:0:1.00:0:0:0.74:0:0:0:1.15:0:0:0:0:0:0:0:0:0:0:0:0:0:0:0:0:0:0:0.91:0:0:0.69:1.45:1.02:0.80:0:0.48:-:0.15	0	0	327	0	0	0	0	0	0	491	0	0	362	0	0	0	566	0	0	0	0	0	0	0	0	0	0	0	0	0	0	0	0
KSAGLVKATGR	1087.29	1087.66	0.13	5.98	6	11.17			1827.76	502.909	895.389	3.63438	2.04131	0.0100378	0.0455348	4.91:0:0:6.48:0:1.28:0.77:0:0:1.00:0:0.42:1.12:6.49:0.40:5.54:4.96:10.58:0.54:5.96:9.35:7.77:4.87:8.00:3.75:7.42:3.86:0.33:16.00:2.64:2.82:0.38:0.79:5.88:4.26:1.72:0:0:2.05:5.02:0:0:1.79:4.49:0:0	1800	0	0	2380	0	469	281	0	0	367	0	154	410	2380	146	2030	1820	3880	198	2190	3430	2850	1790	2940	1380	2720	1420	122	5870	970	1040	141	291
TVPVALPIQQ	1065.28	533.321	0.03	60	8.3	5.19			1210.29	0	258.333	#DIV/0!	4.68501	0.0360141	0.0441598	0:1.00:0:0:0:0:0:0:0:0:0:0:0:0.23:0.98:0:0:0:0:0:2.33:0.19:0.56:2.15:0:2.32:0.33:0.67:0:0:0.27:0.94:0:0:0:0:0:0:0:0:0:0:0:0:0:0	0	2110	0	0	0	0	0	0	0	0	0	0	0	490	2050	0	0	0	0	0	4910	397	1180	4540	0	4890	699	1420	0	0	559	1980	0
QNGAGEDN(+.98)QQENKPS	1616.57	808.829	0.17	60	5.2	4.14		Deamidation (NQ)	3333.12	0	7458.72	#DIV/0!	0.446875	0.00452759	0.0437099	1.00:0:3.73:7.97:2.00:3.93:0:3.57:9.02:0:10.53:4.23:1.68:0:0.35:2.08:3.72:4.54:3.69:1.70:0:0.50:0:0:1.65:0:0:1.77:0.28:1.97:2.29:5.07:0.58:3.64:1.48:0:0:0:0:0:0:0:0:0:0:0	2300	0	8580	18300	4610	9050	0	8220	20800	0	24200	9740	3880	0	807	4800	8570	10400	8480	3910	0	1160	0	0	3800	0	0	4070	633	4530	5260	11700	1330
AEEVHSDPCENNPCLHGGTCNANGT	2569.69	643	0.08	60	7.7	4.39			994.706	0	192.222	#DIV/0!	5.17477	0.0388003	0.0424693	1.00:0:0:0:0:0:0:1.33:0:0:0:0:0:0:0:0:0:0:0:0.76:0:0:0:0:0:2.10:2.91:1.99:1.99:0:1.63:0:0:0:0:0:0:0:0:0:0:0:0:0:0:0	1490	0	0	0	0	0	0	1970	0	0	0	0	0	0	0	0	0	0	0	1120	0	0	0	0	0	3130	4320	2960	2960	0	2420	0	0
LVEGEIAEEAAEKAT	1559.62	780.391	0.16	60	6.2	3.98			19588.2	0	9775.56	#DIV/0!	2.0038	0.000451414	0.0423762	1.00:0.75:0:0.39:0.79:0:0.34:0:0.30:0:1.02:0:0.88:1.90:3.49:0.79:2.49:0.86:0:0.31:2.02:0:2.36:2.87:0:1.53:2.33:1.24:1.57:3.23:1.34:1.36:0.42:2.72:5.13:0:0:0:0:0:0:0:0:0:0:0	11700	8790	0	4590	9300	0	4040	0	3510	0	12000	0	10300	22200	41000	9230	29200	10100	0	3690	23600	0	27700	33600	0	17900	27300	14600	18300	37800	15800	15900	4910
ENRGGDPHSEAPFAKSDN(+.98)QPSTEKAME	2931.05	977.436	0.64	60	6.1	4.64	sp|Q8WXH0|SYNE2_HUMAN	Deamidation (NQ)	139050	0	319339	#DIV/0!	0.435431	0.0259271	0.0423472	1.00:3.45:1.74:1.20:0.09:0.85:0.36:0.25:3.05:0:1.25:0.32:4.03:0.41:0.20:1.42:1.47:2.02:1.41:0.24:0.02:2.48:0:0:2.01:0:0:0.12:0.09:1.23:0.11:0.24:1.02:0.20:0.33:0:0:0:0:0:0:0:0:0:0:0	249000	858000	433000	298000	22000	211000	90600	62300	759000	0	312000	79400	1000000	101000	49800	354000	365000	504000	351000	59600	4350	618000	0	0	499000	0	0	30100	23000	305000	27700	59300	254000
GIAGPPGARGPPGAVGSPGV	1670.89	835.957	0.12	3.55	5.8	9.75			3225.88	17084.5	9055.56	0.188819	0.356232	0.00455854	0.0418208	0.98:0:0.41:1.07:0.42:0:0:0.32:0:1.00:0.08:0.92:0.10:0:1.38:0:0.55:0:0:0:0.43:0:0:0:0.35:0:0:0.60:0.09:0.35:0.29:0.21:0.12:0:0:0:2.09:1.60:0.66:0:0.10:1.82:1.21:0.40:0.45:0	22000	0	9190	24200	9530	0	0	7230	0	22500	1800	20800	2350	0	31100	0	12300	0	0	0	9690	0	0	0	7920	0	0	13500	2010	7840	6530	4670	2680
DSTFESKSY	1063.09	532.232	0.09	60	1.5	4.37	sp|P02671|FIBA_HUMAN		1922.88	0	4456.5	#DIV/0!	0.431478	0.0156562	0.0417581	0:1.01:2.65:3.27:0.86:1.26:2.05:0:1.09:1.00:0:2.03:0:2.23:0:0.24:0:1.83:0:1.95:0:1.50:0:0:0.96:0.88:0.61:0.71:0.23:0:0.32:0.80:0:0:0:0:0:0:0:0:0:0:0:0:0:0	0	4150	10900	13400	3550	5170	8430	0	4470	4110	0	8340	0	9170	0	997	0	7530	0	8010	0	6140	0	0	3960	3610	2520	2920	939	0	1300	3290	0
PPTPPPLLLLLFPLLLFSRLCGAL	2602.3	867.867	0.01	60	5.5	8.68			0	1716.91	1258.22	0	0	0.00158807	0.0409822	1.00:0:0:0:0:0.13:0:0.96:0:0:0:0.75:0:0:0:0.14:0:0.21:0:0:0:0:0:0:0:0:0:0:0:0:0:0:0:0:0:0.79:0:0:0.10:0:0.34:0:0.43:0.39:0:0.61	7100	0	0	0	0	912	0	6810	0	0	0	5350	0	0	0	966	0	1510	0	0	0	0	0	0	0	0	0	0	0	0	0	0	0
Q(-17.03)EILESEEKGDPNKPSGF	1987.11	993.963	0.09	60	3.9	4.25	sp|O00151|PDLI1_HUMAN	Pyro-glu from Q	4086.47	0	1068.89	#DIV/0!	3.8231	0.0239919	0.0408896	0:0:0:0:1.00:0:0:0:0:0:0:0:0:1.36:1.52:0:1.77:0:0:0:3.70:0:1.95:4.94:0:4.01:2.04:0:0:0:0.45:0:0:1.92:1.38:0:0:0:0:0:0:0:0:0:0:0	0	0	0	0	3400	0	0	0	0	0	0	0	0	4640	5190	0	6010	0	0	0	12600	0	6650	16800	0	13700	6960	0	0	0	1530	0	0
GSNGSPG	574.55	575.247	0.49	60	2.6	5.52	sp|Q96P44|COLA1_HUMAN		18788.8	0	47557.2	#DIV/0!	0.395078	0.00943959	0.0407857	1.00:3.40:2.51:2.88:0:1.74:0.39:1.33:5.65:0:0.18:4.22:0:6.64:0.99:0.88:0.57:0.83:0:0.14:0:0.21:0:0:0.49:2.03:1.94:0.41:0.76:0.30:0.93:1.66:0:2.75:0.77:0:0:0:0:0:0:0:0:0:0:0	25800	87500	64600	74100	0	44900	9960	34300	146000	0	4570	109000	0	171000	25500	22800	14600	21400	0	3690	0	5470	0	0	12600	52200	49900	10600	19500	7850	24100	42800	0
LSKHIKT	826.01	826.524	0.01	60	8	10			0	148.436	187.889	0	0	0.0243525	0.0398007	0:0:0:0:0:0:0.76:0:0:1.00:3.90:1.35:2.39:0:0:0:0.52:0:0:0:0:0:0:0:0:0:0:0:0:0:0:0:0:0:0:0:1.22:0:0:1.06:0:0:0:0:0.23:2.28	0	0	0	0	0	0	258	0	0	341	1330	461	814	0	0	0	178	0	0	0	0	0	0	0	0	0	0	0	0	0	0	0	0
FTFDNVLPGK	1137.3	569.303	0.05	60	6.8	5.84			1681.76	0	618.889	#DIV/0!	2.71739	0.00215844	0.0393739	0:0:0:0:1.00:0:0:0:0:0:0:0:0:2.17:0:1.57:0.84:0:0:0:1.16:0:1.89:1.18:0:0:2.06:0.78:1.41:1.32:0.79:0:0:2.19:1.54:0:0:0:0:0:0:0:0:0:0:0	0	0	0	0	2000	0	0	0	0	0	0	0	0	4320	0	3140	1680	0	0	0	2310	0	3770	2360	0	0	4110	1550	2810	2640	1580	0	0
LAETLKREKLKVAN(+.98)KIESIPVKGIIPSKKTKQKEV	3946.77	987.099	0.01	5.26	9.4	10.1		Deamidation (NQ)	67.6471	937.273	940	0.0721744	0.071965	0.0432947	0.0390133	0:1.00:0.28:0:0:0:0:0.22:0:0:0:0:0:0:0.76:0:0.32:0.92:0:0:0:0:0:0.24:0:0:0:0:0:0:0:0:0:0:0:0:0.37:0:0.38:0:0:1.12:0:0.27:0:0	0	4840	1340	0	0	0	0	1050	0	0	0	0	0	0	3670	0	1550	4470	0	0	0	0	0	1150	0	0	0	0	0	0	0	0	0
RTPQGIGLLAKTPLSRPVK	2032.46	1016.63	0.09	6.31	8.1	12.02			262.059	1714	2073	0.152893	0.126415	0.0126399	0.0389718	2.33:2.92:14.93:5.27:21.75:0.53:0:0:2.53:1.00:0:1.82:4.41:1.95:3.03:0:0:0:0:0:0:0:1.23:0:2.54:0:0:0.67:0.87:0:1.58:0.56:0:0:0:0.59:3.85:0:0:1.53:2.16:0.88:7.32:11.64:3.60:0	1390	1740	8920	3150	13000	317	0	0	1510	597	0	1090	2630	1160	1810	0	0	0	0	0	0	0	737	0	1520	0	0	400	520	0	941	337	0
Q(-17.03)QCPN(+.98)MCSGHGSCD	1430.55	725.74	0.32	60	4.6	5.08		Pyro-glu from Q; Deamidation (NQ)	48301.5	0	99772.2	#DIV/0!	0.484117	0.0057782	0.0384178	1.00:0.40:0.06:0.43:0.23:0.08:0.36:0.25:0.18:0:0.08:0.32:0.76:0.17:0.64:0.38:1.21:0.58:0.04:0.12:0.03:0.30:0.03:0.00:0.28:0.02:0.05:0.46:0.25:0.12:0.80:0.36:0:0.15:0.23:0:0:0:0:0:0:0:0:0:0:0	252000	101000	15000	108000	57300	20200	91400	62200	45600	0	20500	79800	192000	44000	160000	94900	306000	146000	10700	30800	8480	74900	8370	305	69900	5170	13700	117000	63400	30200	202000	91800	0
GNALVVDPKK	1040.23	1040.61	0.06	5.58	7.9	8.59			195.9	541.909	53.5611	0.3615	3.6575	0.0421148	0.0382635	0.36:0:0:0:0:0:0.12:0:0:1.00:0:0:0:0:0:1.41:0:0:0:0.92:0:2.34:0.59:0:0.19:0:0.11:0:0.65:1.87:0:0:1.37:0.84:1.08:1.10:3.59:0:3.10:3.07:5.08:0:1.43:0.50:0:0	121	0	0	0	0	0	39.1	0	0	334	0	0	0	0	0	470	0	0	0	308	0	783	197	0	62.1	0	37.2	0	218	626	0	0	459
LKARKSATV	973.18	487.31	0.05	60	8.1	11.17			1075.88	0	322.222	#DIV/0!	3.33895	0.00764471	0.0380714	0:0:0:0:1.00:2.17:0:0:0:0:0:0:0:0:2.93:0:0:0:2.09:3.06:2.92:0:3.05:2.27:0:0:0:1.96:2.32:0:0:0:1.59:0:0:0:0:0:0:0:0:0:0:0:0:0	0	0	0	0	950	2060	0	0	0	0	0	0	0	0	2790	0	0	0	1980	2910	2770	0	2900	2160	0	0	0	1860	2200	0	0	0	1510
TLIRKVFN	990.21	495.808	0.09	60	5.5	11			1760.59	0	808.111	#DIV/0!	2.17865	0.00076962	0.0367936	1.00:1.22:2.14:2.06:2.21:0:0:0:0:0:0:0.82:2.18:0:0:0:2.77:0:2.69:0:2.36:0:3.54:4.06:0:2.21:0:2.07:4.37:2.52:0:1.62:1.78:2.43:0:0:0:0:0:0:0:0:0:0:0:0	1010	1230	2170	2080	2230	0	0	0	0	0	0	826	2200	0	0	0	2800	0	2710	0	2380	0	3570	4090	0	2230	0	2090	4420	2550	0	1630	1800
ISRPVGVSKPIGVSKPVTIGKPVGVSKPIGISKPVSVGRP	3975.82	994.348	0.03	5.33	7.9	12.04			191.765	860.727	1343.28	0.222794	0.142759	0.0321773	0.0353507	0:0.25:0:0:0:0:0:0:2.52:1.00:0.75:0:0:1.51:2.22:0:0:2.18:0:0:0:0:0:0:0:0:0:0:0:0:0.81:0:0:0.60:0:0.87:0.75:0:0.37:1.28:0.34:0:0:0:0.47:0	0	579	0	0	0	0	0	0	5830	2320	1740	0	0	3500	5150	0	0	5060	0	0	0	0	0	0	0	0	0	0	0	0	1880	0	0
LRQLALLLWKNYTLQ(+.98)KRKVLVT	2699.32	675.423	0.01	60	9.3	11.17		Deamidation (NQ)	0	575.636	597.389	0	0	0.0238367	0.0349054	0:1.00:0:0:0:0:1.71:0:0:0:0:0:0:1.29:2.38:0:0:0.57:0:0:0:0:0:0:0:0:0:0:0:-:0:0:0:0:0:0:0:0.37:1.25:0:0:0:0:0:0.55:1.92	0	1550	0	0	0	0	2640	0	0	0	0	0	0	2000	3680	0	0	883	0	0	0	0	0	0	0	0	0	0	0	0	0	0	0
HPGMPGGM(+15.99)GT	957.08	957.409	0.12	60	9.6	6.74		Oxidation (M)	0	685.455	413.333	0	0	0.00148782	0.0347843	1.00:0.76:0:0:0.90:0:0:1.19:0:0:0:0:0:0.15:0:0:0:0:0:0:0:0:0:0:0:0:0:0:0:0:0:0:0:0:0:0.65:0:0:0.96:0.69:0.83:0.92:0:0:0:0	1860	1410	0	0	1670	0	0	2220	0	0	0	0	0	280	0	0	0	0	0	0	0	0	0	0	0	0	0	0	0	0	0	0	0
YVHPALVGKDKKGRAPIPPL	2156.6	1078.65	0.04	3.76	8.7	10			2297.53	306.364	807.778	7.49935	2.84426	0.0152859	0.0344778	0:0:0:0:0:1.00:1.43:0:0:0:0:0:0:0:0.80:0.73:0.67:0:0.34:1.95:0:0:2.56:0:0.76:0:0.82:0.86:0:1.01:1.36:1.41:0.08:1.30:0:0:0:0:0:0.47:0:0:0:0.60:0:0	0	0	0	0	0	3140	4480	0	0	0	0	0	0	0	2520	2310	2090	0	1070	6110	0	0	8030	0	2400	0	2560	2700	0	3160	4280	4420	248
N(+.98)PGGDFGKKELSP	1345.45	673.831	0.07	60	3.8	6.07		Deamidation (NQ)	3560	0	8880	#DIV/0!	0.400901	0.0488813	0.0342691	0:1.00:3.21:1.36:0:2.82:1.66:0.41:3.23:0:2.60:3.13:0.64:1.34:0:1.31:0.74:0:2.85:0.77:0:0.88:0:0:2.09:0:0:1.07:0.51:0:0:0:0.72:0:0:0:0:0:0:0:0:0:0:0:0:0	0	6820	21900	9240	0	19300	11300	2830	22000	0	17700	21300	4350	9130	0	8950	5020	0	19400	5220	0	6030	0	0	14200	0	0	7270	3470	0	0	0	4930
Q(-17.03)NILLLVLAM	1110.42	1110.67	0.17	3.23	7.3	5.52		Pyro-glu from Q	1272.29	517	597.833	2.46092	2.12818	0.0173788	0.0333305	0:0:0.06:0.07:0.67:0.21:0.08:0:0:1.00:0:0.36:0:0:0.05:0.25:0.21:0:0.24:0.28:0.42:0.33:0.45:0.34:0.21:0.32:0.26:0.37:0.04:0.14:0.85:0.21:0.79:0.57:0.14:0.45:0.13:0:0:0.35:0:0:0.53:0.12:0:0	0	0	207	261	2440	779	295	0	0	3620	0	1310	0	0	174	915	760	0	859	1030	1510	1210	1640	1240	764	1150	938	1360	129	496	3090	766	2860
Q(-17.03)EKPSSPSPMPSSTPSPSLNLG	2208.43	736.684	0.02	60	9.2	6		Pyro-glu from Q	2479.35	0	448.333	#DIV/0!	5.53016	0.0318859	0.0333085	0:0:0:0:0:0:0:0:0:0:0:0:0:1.00:0.45:0:0:0:0:0:0.83:0:1.16:0:0:0.99:0.06:0:1.13:1.62:0:0:0:0:1.77:0:0:0:0:0:0:0:0:0:0:0	0	0	0	0	0	0	0	0	0	0	0	0	0	5570	2500	0	0	0	0	0	4650	0	6480	0	0	5530	339	0	6290	9020	0	0	0
HATPLPKK	891.08	891.547	0.06	3.29	6.2	10			85.5882	368.636	385.889	0.232175	0.221795	0.0465871	0.0330944	0.70:0:0.99:0:0.65:0.15:0:0:0:1.00:0:0:0:1.82:0:0:0.71:0.78:0.16:0.24:0:0:0:0:0:0.33:0:0:0:0:0:0:0.10:0.23:0.37:1.06:1.66:0:0:0.26:0.25:0.41:0:0.20:0.13:0	715	0	1010	0	659	156	0	0	0	1020	0	0	0	1860	0	0	730	796	161	246	0	0	0	0	0	337	0	0	0	0	0	0	100
RGLRRVM	887.11	887.547	0.06	3.56	6.1	12.3			125.353	946.055	588.222	0.132501	0.213105	0.0465383	0.0329615	1.34:0:0.84:0.32:1.64:2.72:0:0:0:1.00:0.16:0:0:4.66:0.35:1.43:0:1.06:0.94:0:0.43:0:0:0.48:0.73:0.30:0:0:0.24:0:0:0:0:0:0:3.16:7.71:0:0:0.48:0:0:2.25:1.57:0.07:0	914	0	573	217	1120	1860	0	0	0	683	106	0	0	3180	237	975	0	723	644	0	292	0	0	329	500	204	0	0	162	0	0	0	0
QPPRISKAQK	1152.36	1152.68	0.01	60	5.5	11.17			359.035	0	72.1667	#DIV/0!	4.97508	0.0198678	0.032941	0:0:0:0:0:0:1.00:0:0:0:0:0:0:0:0:5.53:0:0:0:0:3.82:2.65:8.20:4.59:0:2.03:0.31:0:0:3.98:0:0:4.00:0:1.09:0:0:0:0:0:0:0:0:0:0:0	0	0	0	0	0	0	199	0	0	0	0	0	0	0	0	1100	0	0	0	0	761	527	1630	914	0	403	62.6	0	0	793	0	0	797
PRVPKYV	858.05	858.532	0.03	4.94	5.3	10.01			43.2353	562.818	256.05	0.0768193	0.168855	0.0453428	0.0311992	0:0:0:-:0.18:2.20:1.25:0:0:1.00:0:2.71:2.40:0:2.54:0:0:0.31:0:0:0:0:0:0.14:0:0.56:0:0:0:0.62:0:0:0:0.69:0:9.34:0:0:0:0:1.96:0:0.67:0:2.01:2.92	0	0	0	0	64.9	807	458	0	0	366	0	991	879	0	930	0	0	113	0	0	0	0	0	50	0	204	0	0	0	227	0	0	0
KIFVLI	731.98	732.502	0.15	60	5.9	8.75			2093.24	0	767.222	#DIV/0!	2.72833	0.000673376	0.0304548	0:0:0:0:1.00:3.45:0:0:0:0:0:0.86:0:0:4.58:0.82:0:0:2.44:0:0:2.34:2.70:2.33:0.57:3.63:1.50:2.06:4.29:0.39:0.51:0.45:0.41:3.46:0.53:0:0:0:0:0:0:0:0:0:0:0	0	0	0	0	1290	4450	0	0	0	0	0	1110	0	0	5910	1050	0	0	3150	0	0	3010	3480	3000	736	4680	1940	2650	5530	504	664	577	524
RRLLESLRGPALDVIRVLKIN(+.98)N(+.98)PLITV	3071.69	1024.29	0.12	4.37	8.3	11.54		Deamidation (NQ)	3888.65	1649.09	1865.5	2.35805	2.08451	0.0330862	0.029717	0:1.00:0.77:0:1.35:0.17:0.04:0:0.26:0:0.15:0.12:0:0.57:0.27:0:0.73:0.46:1.10:1.99:0:1.27:1.15:0.57:0.13:0.42:0.68:0:0.58:0.29:0.53:0.25:0.76:0.98:0.95:0:0.32:0:0.34:0.66:0:0.46:0.91:0.49:0:0	0	5690	4400	0	7690	974	240	0	1500	0	826	689	0	3230	1540	0	4180	2620	6230	11300	0	7200	6530	3250	717	2370	3840	0	3300	1630	3040	1420	4300
KERELEEARKKLAQIRQQ	2253.59	564.075	0.1	60	6.4	9.69			1387	0	290.556	#DIV/0!	4.77361	0.017917	0.0297109	0:0:0:0:0:0:0:0:0:0:0:0:1.00:0.38:0:0:0:0:0:0:0.36:0:1.00:1.03:0:0:0:0.30:0.12:1.15:0:0:0.35:0.55:1.38:0:0:0:0:0:0:0:0:0:0:0	0	0	0	0	0	0	0	0	0	0	0	0	3780	1450	0	0	0	0	0	0	1350	0	3800	3890	0	0	0	1140	439	4350	0	0	1330
Q(-17.03)EKNPLPSKETIEQE	1752.9	876.933	0.04	60	2.4	4.49	sp|P62328|TYB4_HUMAN	Pyro-glu from Q	5130	0	594.444	#DIV/0!	8.62991	0.0456046	0.0293898	0:0:0:0:0:0:0:0:0:0:0:0:0:0:0:0:1.00:0:0:0:1.33:0:1.82:1.66:0:0:0:0:0:0:0:0.51:0:0.78:2.10:0:0:0:0:0:0:0:0:0:0:0	0	0	0	0	0	0	0	0	0	0	0	0	0	0	0	0	10700	0	0	0	14100	0	19400	17700	0	0	0	0	0	0	0	5420	0
LLSVLLYAT	992.22	496.814	0.05	60	5.1	5.52			1349.41	0	230	#DIV/0!	5.86701	0.0324077	0.0292633	0:0:0:0:0:0:1.00:0:0:0:0:0:0:0:1.23:0:0:0:3.05:1.06:0:0.64:0:1.69:0:0:0:0:1.49:3.01:0:0:1.43:0:0:0:0:0:0:0:0:0:0:0:0:0	0	0	0	0	0	0	1850	0	0	0	0	0	0	0	2290	0	0	0	5650	1970	0	1190	0	3130	0	0	0	0	2760	5580	0	0	2660
SKGIKGGKKVY	1164.41	1164.7	0.09	2.72	8.3	10.18			392.341	92.0909	166.667	4.26037	2.35405	0.00821408	0.0286254	0:0:0:1.00:1.40:0:2.94:0:0:0:0:0:0:0:0.94:1.22:0.59:0:0.76:0.63:1.35:1.37:1.10:2.65:2.44:0.70:0.49:0:0:1.50:1.50:0.73:0.19:0.64:1.88:0:0:0:0:0.61:0:0:0:2.12:0:0	0	0	0	372	519	0	1090	0	0	0	0	0	0	0	348	452	219	0	283	236	503	511	410	984	905	262	184	0	0	558	557	271	69.8
HLSQDTGSPSGMRPWEDLPSQDTGSPS	2870.01	957.093	0.14	60	2.9	4.22			2599.06	0	5486.11	#DIV/0!	0.473752	0.022635	0.0285803	1.00:0:0.87:2.14:1.09:0:1.59:1.33:1.43:0:1.37:1.35:0:1.39:0.84:1.13:0:1.69:0.62:0.82:0:0:0:0:0.24:0.61:2.09:0.25:0.34:0:0.10:1.15:0:1.48:0:0:0:0:0:0:0:0:0:0:0:0	5730	0	4980	12300	6230	0	9130	7650	8200	0	7870	7730	0	7950	4800	6490	0	9690	3580	4710	0	0	0	0	1380	3480	12000	1420	1960	0	584	6590	0
GRIYIQAHIDRDVLIVLVRDAKN(+.98)L	2792.27	931.23	0.02	5.26	13.8	8.59		Deamidation (NQ)	32.3529	1425.64	489.167	0.0226937	0.0661389	0.0252666	0.0279577	1.00:3.73:0.68:4.79:1.08:0:0:0:0:0:1.22:0:0:0:0:0:3.08:7.42:1.32:0:0:0:0:0:0:0:0:0:0:0:0:0:0.11:0:0:7.58:1.99:0:0:0:14.15:0:17.23:0:0:0	383	1430	262	1830	414	0	0	0	0	0	466	0	0	0	0	0	1180	2840	506	0	0	0	0	0	0	0	0	0	0	0	0	0	44
KATPVAAAKT	957.14	957.578	0.23	2.44	6.4	10			822.941	2380.82	1740.28	0.345655	0.472879	0.0144573	0.0269606	4.47:18.94:13.93:14.74:13.84:1.13:0:31.55:10.67:1.00:10.27:18.30:0:0:3.36:12.97:7.93:12.86:4.79:3.88:4.22:6.39:13.57:7.41:1.71:2.53:4.25:3.33:0:0:3.03:7.18:2.73:10.99:2.49:4.58:15.74:0:10.88:12.81:1.14:15.55:6.91:19.93:48.29:11.30	796	3370	2480	2620	2460	202	0	5620	1900	178	1830	3260	0	0	599	2310	1410	2290	853	691	752	1140	2420	1320	305	451	756	593	0	0	540	1280	486
EFVSETESRGSESGIFTNTKESSSHHPGIAEFPSRG	3882.09	776.963	0.03	60	2.7	5.06	sp|P02671|FIBA_HUMAN		3290	0	486.667	#DIV/0!	6.76027	0.0283351	0.0266438	0:0:0:0:0:0:0:0:0:0:0:0:0:1.00:0:0:0:0:0:0:1.14:0:1.59:1.02:0:0.85:1.03:0:0:0:0:0.38:0:0.37:0:0:0:0:0:0:0:0:0:0:0:0	0	0	0	0	0	0	0	0	0	0	0	0	0	8760	0	0	0	0	0	0	10000	0	13900	8970	0	7440	9060	0	0	0	0	3290	0
EAQGGA	531.52	532.231	0.16	60	4.9	4			0	2498.18	824.444	0	0	8.2909e-05	0.0265495	0:0.70:0:0:0:0:0:0.70:0:1.00:0.36:0:0:0:0:0:0:0.54:0:0:0:0:0:0:0:0:0:0:0:0:0:0:0:0:0:0:0.62:1.14:0.84:0:1.55:0:0.59:0.33:0.74:0.32	0	3150	0	0	0	0	0	3160	0	4500	1610	0	0	0	0	0	0	2420	0	0	0	0	0	0	0	0	0	0	0	0	0	0	0
DDPDAPLQPVTPLQLFEGR	2108.34	703.358	0.09	2.42	9	3.84			2608.24	723.455	1246.11	3.60525	2.0931	0.0255979	0.0264413	0.80:0:0.29:0:0:0:0.52:0:0.57:1.00:0:0:0:0:0.75:0.56:0.61:0.80:1.11:0.40:0.77:0.45:1.03:1.74:0.27:1.09:0.30:0:0.41:0.67:0.73:0:0.28:1.85:0.57:0:0:0:0:0:0.16:0:1.84:0.09:0:0	3050	0	1100	0	0	0	1990	0	2160	3800	0	0	0	0	2860	2110	2330	3030	4230	1520	2930	1720	3920	6610	1040	4140	1130	0	1560	2540	2770	0	1050
GLRGLAVSGL	942.13	942.569	0.24	3.91	6.2	9.75			6616.06	2296.36	3261.89	2.8811	2.02829	0.0209848	0.0256995	1.08:0.19:1.66:0.18:0.28:0.10:3.05:1.07:1.67:1.00:3.52:2.40:1.31:0.30:0.91:0.49:1.95:0.19:3.36:3.59:7.40:1.29:5.55:0.19:0.49:3.15:4.01:1.68:0.74:1.04:2.99:1.80:0.68:1.88:1.08:1.91:2.84:0:0.43:0.65:0.27:2.24:0.19:0.58:0.07:0	2980	510	4570	507	777	281	8400	2930	4580	2750	9670	6590	3610	837	2490	1350	5350	532	9230	9870	20300	3560	15300	533	1360	8660	11000	4630	2030	2850	8210	4940	1860
DSGEGDFLAEGGG	1210.18	605.745	0.32	60	3.4	3.43	sp|P02671|FIBA_HUMAN		2115.88	0	6362.22	#DIV/0!	0.33257	0.012006	0.025575	1.00:1.04:1.12:0:1.66:0:0:0:0:0:3.56:0:3.14:5.04:1.62:1.36:3.93:2.07:0.96:0.58:0:0:0:0:1.26:0:0:0:0.74:1.37:0.42:0:1.42:0:1.27:0:0:0:0:0:0:0:0:0:0:0	4480	4650	5010	0	7440	0	0	0	0	0	16000	0	14100	22600	7250	6120	17600	9270	4310	2610	0	0	0	0	5660	0	0	0	3320	6160	1860	0	6360
LQVGIPVA	795.98	796.485	0.05	5.08	10.7	5.52			78	605.364	752.389	0.128848	0.10367	0.0128476	0.0255684	2.26:0:0:0:0:0.44:0:1.18:0:1.00:0.66:0.07:0.20:0.50:0.59:0:0:0:0:0:0.11:0:0:0.07:0:0:0.21:0:0:0:0:0.28:0:0:0:0.22:0:0:1.29:0:0.66:0.27:0.65:0.16:0:0.14	4430	0	0	0	0	856	0	2310	0	1970	1300	145	395	977	1160	0	0	0	0	0	207	0	0	146	0	0	423	0	0	0	0	550	0
Q(-17.03)VKMKPKITRPPINVKII	2086.38	696.095	0.03	5.43	6.1	11.33		Pyro-glu from Q	37.3529	2087.15	2765.61	0.0178967	0.0135062	0.00413477	0.0255486	0:0:2.53:0:8.73:0:4.31:0:0:1.00:8.15:2.15:0:0.97:0.66:0:0.06:0:0:0:0:0:0:0:0:0:0:0.20:0:0:0.16:0:0:0:0:0.94:1.08:1.09:0.51:0:3.26:0.04:4.90:0:0:1.32	0	0	4420	0	15200	0	7520	0	0	1750	14200	3750	0	1690	1150	0	101	0	0	0	0	0	0	0	0	0	0	348	0	0	287	0	0
PNTAR	557.61	558.287	0.34	60	3.5	10.18			1001.18	3898.18	307.222	0.256832	3.2588	2.88701e-05	0.0254247	0:1.00:0:0:0:0:0:0:0:0:0:0:0:0:0.47:0.37:0:0:0.55:0:0:0:0.68:0:0.41:0:0.40:0.37:0.59:0.60:0:0:0.36:0.78:0.91:0.57:1.74:1.02:1.48:1.86:1.05:2.82:1.58:0.62:0.74:0.77	0	3010	0	0	0	0	0	0	0	0	0	0	0	0	1410	1110	0	0	1650	0	0	0	2050	0	1240	0	1200	1110	1780	1820	0	0	1080
SGITGIVTKPIKGAQKGG	1712.02	856.523	0.26	4.41	5.4	10.3			3093.29	6335.45	7821.56	0.488251	0.395483	0.0112218	0.0239154	0.07:0.33:0:0.16:0.07:0.01:0:0.33:0.44:1.00:0.49:0.31:0.14:0.06:0.13:0.28:0.34:0.23:0:0.04:0.07:0.04:0.12:0.14:0.19:0:0.13:0.31:0.08:0.01:0.04:0.23:0.07:0.04:0.13:0.23:0.14:0.16:0.39:0.04:0.08:0.09:0.33:0.21:0.28:0.22	2110	10600	0	5240	2400	268	0	10500	14000	32100	15700	10000	4490	1770	4320	9050	10900	7340	0	1360	2100	1350	3770	4610	5980	0	4170	10000	2620	186	1190	7460	2340
TLLPPALRALR	1220.52	610.895	0.09	60	5.2	12	sp|A6NKX4|S22AV_HUMAN		1295.29	0	351.111	#DIV/0!	3.68913	0.00102589	0.0238602	0:0:0:0:0:1.00:0:0:0:0:0:0:0:0:3.78:0:0:0:1.93:2.60:0:1.10:1.69:0:0:0.77:0:0.81:1.10:1.99:1.36:0:1.34:2.00:0:0:0:0:0:0:0:0:0:0:0:0	0	0	0	0	0	1320	0	0	0	0	0	0	0	0	5000	0	0	0	2550	3430	0	1450	2230	0	0	1010	0	1060	1460	2630	1790	0	1770
GRPGPCADVN	985.08	493.232	0.09	5.81	7	5.83			21	170.091	157.389	0.123463	0.133427	0.0070162	0.0224093	0:2.35:0:0:0:0:0:1.37:2.53:1.00:1.74:1.39:0:0:1.32:0:0:0:0:0:0:0:1.47:0:0:0:0:0:0:0:0:0:0:0:0:0:0:0.84:1.56:1.65:1.80:0:1.25:0:0.62:0	0	569	0	0	0	0	0	331	613	242	421	338	0	0	319	0	0	0	0	0	0	0	357	0	0	0	0	0	0	0	0	0	0
SSGGGSGGGYGN(+.98)Q(+.98)DQS	1416.28	708.751	0.15	60	5.8	3.8		Deamidation (NQ)	2142.94	0	5092.22	#DIV/0!	0.420826	0.00100645	0.0208859	1.00:0.84:0.34:0.20:0.38:0.27:0.66:0.71:0:0:3.15:1.06:2.56:1.29:0.51:0.78:2.13:2.23:1.04:0:0.63:0.24:0:0:0:0.98:0.65:0.52:0.35:0.49:0.56:0:0.21:1.11:0.42:0:0:0:0:0:0:0:0:0:0:0	5060	4240	1720	1030	1940	1360	3340	3600	0	0	15900	5390	12900	6530	2590	3960	10800	11300	5240	0	3190	1210	0	0	0	4970	3310	2620	1760	2470	2850	0	1060
DFLAEGGGV	863.92	864.408	0.27	60	5.5	3.67	sp|P02671|FIBA_HUMAN		153447	0	464600	#DIV/0!	0.330278	0.000281822	0.0207741	1.00:0.63:0.20:0.15:0.21:0.11:0.36:0.46:0.36:0:2.02:0.50:1.30:0.21:0.11:0.13:0.75:2.32:0.59:0.13:0.05:0.23:0.07:0.12:0.19:0.02:0.03:0.20:0.07:0.21:0.15:0.49:0.24:0.31:0.28:0:0:0:0:0:0:0:0:0:0:0	773000	486000	156000	116000	161000	82900	282000	356000	281000	0	1560000	384000	1000000	162000	84700	99200	579000	1800000	455000	97900	42400	181000	54000	89600	147000	16200	21600	153000	57900	161000	112000	382000	183000
SSETF	569.57	570.246	0.44	17.9	5.2	4			17893.2	102.273	43135.6	174.956	0.414814	0.0094988	0.0200033	1.00:1.39:0.87:0.79:0:0.32:0.06:0.90:1.89:0:0.54:1.12:0:1.91:0.64:0.39:0.69:0.06:0:0.03:0:0.01:0.06:0:0.07:0.68:0.63:0.25:0.27:0.18:0.29:1.04:0:0.88:0.55:0:0:0:0.01:0:0:0.01:0:0:0:0	61700	85800	53800	48900	0	19900	3960	55800	116000	0	33400	69300	0	118000	39500	24200	42500	3680	0	1770	0	395	3660	0	4360	41800	38900	15300	16500	11200	18000	64100	0
TATSEYQTFFNPR	1561.67	521.247	0.3	60	3.9	5.66			18855.3	0	41227.8	#DIV/0!	0.457344	0.000519881	0.0171436	1.00:0.56:0.63:0.84:0.21:0.47:0.20:0.24:1.27:0:0.56:1.98:0.60:0.17:0.19:0.35:0.56:0.66:0.31:0.12:0.09:0.79:0:0:0.33:0.21:0.14:0.27:0.14:0.67:0.08:0.48:0.44:0.17:0.30:0:0:0:0:0:0:0:0:0:0:0	70500	39700	44600	59500	15100	32900	14100	17300	89700	0	39500	140000	42700	12200	13600	24900	39400	46400	21700	8640	6580	55900	0	0	23100	14700	10000	19300	9900	47400	5620	33600	30800
LLTLVLSLLPPQ	1306.65	653.929	0.15	60	4.7	5.52			3112.94	0	844.444	#DIV/0!	3.68638	0.00567744	0.0164313	0:0:0:0:1.00:0:1.77:0:0:0:0:0:0:0:0:1.49:1.37:0:2.17:4.39:0:0:0:1.58:1.00:1.88:2.23:0:0:0:1.07:1.01:1.56:0:2.70:0:0:0:0:0:0:0:0:0:0:0	0	0	0	0	2700	0	4780	0	0	0	0	0	0	0	0	4020	3700	0	5860	11900	0	0	0	4260	2700	5080	6010	0	0	0	2880	2730	4220
CSPDTGSC	768.81	385.127	0.1	60	2.6	3.8			538.588	0	35.9444	#DIV/0!	14.9839	0.0412839	0.0160749	0:0:0:0:0:0:0:0:0:0:0:0:1.00:0:0:0:0:0:0:1.15:0:3.48:0:0:2.15:0:0:3.39:2.46:0:0:0:0:1.54:0:0:0:0:0:0:0:0:0:0:0:0	0	0	0	0	0	0	0	0	0	0	0	0	647	0	0	0	0	0	0	742	0	2250	0	0	1390	0	0	2190	1590	0	0	0	0
AIPAILIGAIGAS	1166.43	583.86	0.12	60	5.6	5.57			2895.88	0	865.111	#DIV/0!	3.34741	0.0016744	0.0156697	0:0:1.00:1.90:2.64:0:0:0:0:0:0:0:0:0:1.75:4.53:12.42:0:11.52:8.51:10.69:9.60:4.15:4.93:0:0:0:3.46:11.23:0:3.71:1.82:0:3.56:3.48:0:0:0:0:0:0:0:0:0:0:0	0	0	642	1220	1700	0	0	0	0	0	0	0	0	0	1120	2910	7980	0	7400	5470	6870	6160	2660	3160	0	0	0	2230	7210	0	2380	1170	0
RLMLTL	745.98	746.469	0.02	60	9.5	9.75			0	701	361.111	0	0	0.00493968	0.0152651	0:0.28:0:0.52:0:0:0:0:1.69:1.00:1.54:0:0.99:2.55:0:0:0:0:0:0:0:0:0:0:0:0:0:0:0:0:0:0:0:0:0:0:0:0:1.04:0:0:2.60:1.65:0:1.28:3.59	0	210	0	393	0	0	0	0	1290	759	1170	0	748	1930	0	0	0	0	0	0	0	0	0	0	0	0	0	0	0	0	0	0	0
Q(-17.03)AGAAGSRMNFRPGVL	1614.84	807.913	0.07	60	5.8	12		Pyro-glu from Q	8797.06	0	1513.89	#DIV/0!	5.8109	0.016075	0.0150528	0:0:0:0:0:0:1.00:0:0:0:0:0:0:1.69:4.32:0:0:0:2.00:0.87:6.00:0:5.58:7.95:0:5.28:5.37:0:0:0:0:0:0:5.42:0:0:0:0:0:0:0:0:0:0:0:0	0	0	0	0	0	0	3890	0	0	0	0	0	0	6560	16800	0	0	0	7770	3380	23300	0	21700	30900	0	20500	20900	0	0	0	0	0	0
FLAEGGGVR	905.02	453.245	0.12	60	4.7	6	sp|P02671|FIBA_HUMAN		21692.1	0	54861.1	#DIV/0!	0.395401	0.00311383	0.0149699	1.00:5.03:1.70:0.66:0.56:1.12:0.65:0.39:3.82:0:2.02:1.14:5.08:0.36:0.81:3.75:1.76:3.79:0.60:0.93:0:2.04:0:0:1.50:0.04:0.03:1.06:0.81:2.12:0.45:0.46:1.92:0.21:0.41:0:0:0:0:0:0:0:0:0:0:0	29400	148000	49900	19400	16400	33000	19000	11500	112000	0	59300	33300	149000	10700	23800	110000	51800	111000	17600	27200	0	59800	0	0	44100	1140	786	31000	23800	62300	13100	13400	56400
GFAGLLAILLV	1086.38	543.851	0.11	60	8.7	5.52			4077.06	0	1572.78	#DIV/0!	2.59227	0.000152994	0.0149454	0:0:0:0:1.00:0:0.60:1.17:0:0:0.45:0:0:0:0:2.22:2.00:0:1.32:0.81:1.51:0.91:1.91:2.89:0:0:0.80:1.03:0:1.32:1.93:0.91:1.27:0:1.62:0:0:0:0:0:0:0:0:0:0:0	0	0	0	0	3800	0	2290	4440	0	0	1730	0	0	0	0	8450	7600	0	5020	3090	5720	3450	7270	11000	0	0	3040	3930	0	5030	7330	3460	4830
LSKKRKFPK	1131.43	566.375	0.09	60	4	11.33			916.471	0	240.389	#DIV/0!	3.81245	0.00468297	0.0139338	1.00:0:0:0:1.89:0:0:0:0:0:0:0:0:3.11:0:1.92:0:0:4.47:0:4.01:0:4.62:2.87:0:0:0:2.14:0:3.58:0:0:2.18:2.59:2.02:0:0:0:0:0:0:0:0:0:0:0	547	0	0	0	1030	0	0	0	0	0	0	0	0	1700	0	1050	0	0	2450	0	2190	0	2530	1570	0	0	0	1170	0	1960	0	0	1190
YEGSYALTSEEAERSDGDPVQPAVLQVHQTS	3364.54	1121.86	0.12	60	8	4.08			14097.1	0	6057.78	#DIV/0!	2.3271	0.000361286	0.0124734	1.00:0:0:0.84:1.25:0:2.51:1.36:0:0:0:0.49:1.06:2.42:2.07:1.43:1.99:0:3.22:2.19:2.13:0:0:1.70:0:3.54:6.90:2.94:2.53:3.61:1.08:1.37:1.80:0.70:2.35:0:0:0:0:0:0:0:0:0:0:0	6640	0	0	5560	8300	0	16700	9020	0	0	0	3290	7010	16100	13700	9520	13200	0	21400	14600	14200	0	0	11300	0	23500	45800	19500	16800	24000	7170	9120	12000
SYALTSEEAERSDGDPVQPAVLQVHQTS	3015.2	1005.48	0.08	60	6.4	4.17			7245.88	0	3093.89	#DIV/0!	2.342	0.00019302	0.0123501	0:0:0:0:1.00:0:1.76:1.97:0:0:1.95:0:2.86:3.04:3.22:2.02:4.48:0:1.85:0.85:7.73:0:4.02:3.79:0:1.61:4.16:1.66:1.27:6.24:1.88:3.03:1.81:3.55:5.88:0:0:0:0:0:0:0:0:0:0:0	0	0	0	0	2500	0	4390	4910	0	0	4870	0	7140	7600	8040	5040	11200	0	4620	2120	19300	0	10000	9460	0	4030	10400	4140	3170	15600	4690	7560	4520
GEGDFLAEGGGV	1107.14	554.25	0.3	60	2.6	3.57	sp|P02671|FIBA_HUMAN		155388	0	333611	#DIV/0!	0.465777	7.58367e-05	0.0122756	1.00:0.92:0.54:1.00:0.88:0.58:0.65:0.69:0.67:0:3.61:2.45:1.98:0.89:0.40:0.74:1.66:2.18:1.57:0.31:0.19:0.48:0.16:0.26:0.67:0.13:0.22:0.83:0.20:0.86:0.58:0.90:0.76:0.69:0.35:0:0:0:0:0:0:0:0:0:0:0	288000	265000	156000	289000	253000	167000	187000	198000	192000	0	1040000	706000	570000	258000	115000	214000	479000	628000	453000	90700	55500	138000	45300	75900	193000	38300	62800	239000	57400	248000	167000	260000	219000
DGLTMN(+.98)YCRN(+.98)PDADTGPWCFTMDPSIRWEYCN(+.98)LTRCSDTEGT	4839.27	968.391	0.24	60	8.6	4.09		Deamidation (NQ)	13520	0	4609.44	#DIV/0!	2.93311	0.00160802	0.0122437	1.00:0:0:1.80:0.31:0:0.27:0:0.95:0:0:1.02:0:0:0.28:0:0.61:0.43:0.70:0.63:2.11:0:0.43:2.75:0.92:1.68:2.09:0.11:0.80:0.36:0:1.57:0:3.39:0.97:0:0:0:0:0:0:0:0:0:0:0	12400	0	0	22400	3850	0	3290	0	11900	0	0	12700	0	0	3440	0	7610	5380	8740	7880	26100	0	5320	34100	11400	20900	25900	1420	9910	4470	0	19500	0
AFKVPAPK	857.06	429.27	0.09	60	5.7	10			1029.53	0	163.889	#DIV/0!	6.28187	0.0141314	0.0119659	0:0:0:0:1.00:0:0.75:0:0:0:0:0:0:0:0:0:0:0:1.27:0:1.37:0:1.74:2.30:0:0:0:0.39:0.89:1.16:0:0:1.25:0:0:0:0:0:0:0:0:0:0:0:0:0	0	0	0	0	1690	0	1260	0	0	0	0	0	0	0	0	0	0	0	2140	0	2310	0	2940	3880	0	0	0	652	1510	1960	0	0	2110
LKKALLLQ(+.98)GSN	1185.42	593.377	0.15	7.27	5.3	10		Deamidation (NQ)	5412.94	261.727	2067.22	20.6816	2.61846	0.000357832	0.0119242	1.00:0:0:0:6.01:0:2.46:4.18:0:0:0:0:4.49:0:10.48:5.81:0:0:12.12:7.94:0:0:9.34:11.21:5.22:3.00:2.55:4.93:4.41:2.02:4.98:2.35:6.63:0:8.38:0:0:0:0:0:0:0:0:1.43:0.92:0.32	1080	0	0	0	6510	0	2660	4530	0	0	0	0	4850	0	11300	6280	0	0	13100	8590	0	0	10100	12100	5650	3250	2760	5340	4770	2190	5390	2540	7170
KKVVSSK	774.96	388.253	0.05	60	5.1	10.3			2130.71	0	484.444	#DIV/0!	4.39825	0.00588135	0.0118631	0:0:0:0:0:0:1.00:0:0:0:0:0:0:1.33:0:0:0.72:0:0:0:0:0.64:0.13:1.39:0.75:2.88:1.70:0.79:0:0:1.27:0.66:0:1.65:0.81:0:0:0:0:0:0:0:0:0:0:0	0	0	0	0	0	0	2860	0	0	0	0	0	0	3800	0	0	2060	0	0	0	0	1830	362	3970	2140	8230	4870	2260	0	0	3620	1900	0
NGFKSHALQLNNRQIR	1896.14	474.763	0.3	10.46	1.8	12.01			3016.47	214527	11870.6	0.014061	0.254114	3.66547e-06	0.0115161	1.00:1.41:0.83:0.38:0.14:0.64:0.57:0:0.29:0:0:0:0.76:0:0.17:0.10:0.17:0.34:0.54:0.13:0:0.23:0:0:0:0:0:0.11:0.09:0:0.06:0:0.15:0.32:0:14.35:4.94:4.35:15.76:3.88:4.69:10.64:2.80:1.12:8.22:4.43	31400	44200	26000	11800	4460	20100	18000	0	9140	0	0	0	23900	0	5420	3240	5210	10800	17100	3960	0	7150	0	0	0	0	0	3410	2930	0	1810	0	4720
KITHRIHWESASLL	1690.97	564.31	0.03	60	4.5	8.76	sp|P01024|CO3_HUMAN		762.294	0	60.3389	#DIV/0!	12.6335	0.0305609	0.0113763	0:0:0:1.00:0:0:0.76:0.06:0:0:0:0:0:0:0:0:0:0:0:5.09:4.39:0:1.97:4.42:0:2.91:0:0:0:0:0.99:1.93:0:0:0:0:0:0:0:0:0:0:0:0:0:0	0	0	0	597	0	0	451	38.1	0	0	0	0	0	0	0	0	0	0	0	3040	2620	0	1180	2640	0	1740	0	0	0	0	589	1150	0
LVEGEIAEEAAEKATS	1646.77	823.905	0.04	60	3.4	3.98			1760.59	0	225	#DIV/0!	7.82484	0.0189687	0.010907	0:0:0:0:0:0:0:0:0:0:0:0:1.00:0:1.37:0:0:0:0:0:1.91:0:0:0:0:2.15:3.44:1.48:0.85:2.71:0.93:0:0:0:4.01:0:0:0:0:0:0:0:0:0:0:0	0	0	0	0	0	0	0	0	0	0	0	0	1710	0	2340	0	0	0	0	0	3270	0	0	0	0	3680	5890	2530	1460	4650	1590	0	0
LGQKVCRPVVLKPIPTKPAV	2143.71	1072.16	0.19	2.43	6.2	10.32			1801.12	4536.36	4849.44	0.39704	0.371407	0.0470555	0.0107961	1.87:1.18:0.67:0.21:0.72:0.83:0.44:0:1.20:1.00:0.44:0:0.51:0.37:0.08:0.33:2.05:0.37:0.06:0:0.16:0.38:0.12:0.31:0.95:0:0:0.86:0.38:0:0.22:0:0.20:0.49:0.18:0:0.45:0:0:1.65:0.19:1.49:1.38:0.59:1.27:0	13300	8390	4750	1490	5140	5880	3140	0	8530	7120	3160	0	3620	2650	570	2320	14600	2630	401	0	1130	2700	858	2180	6800	0	0	6120	2710	0	1580	0	1400
GKSSSYSKQFTSSTSYNRGDSTFESKSYKMADEAGSEADHEGTHST	4972.13	994.839	0.03	60	3	5.46	sp|P02671|FIBA_HUMAN		1092.35	0	0	#DIV/0!	#DIV/0!	0.0432092	0.00984123	0:0:0:0:0:0:0:0:0:0:0:0:0:0:0:0:0:0:1.00:0:1.27:0:0:1.12:0:0.54:0.32:0:0:0:0:0:0:1.18:0:0:0:0:0:0:0:0:0:0:0:0	0	0	0	0	0	0	0	0	0	0	0	0	0	0	0	0	0	0	3420	0	4340	0	0	3830	0	1860	1080	0	0	0	0	0	0
SSKITHRIHWESASLL	1865.12	467.006	0.27	60	3.3	8.51	sp|P01024|CO3_HUMAN		6858.82	0	2136.67	#DIV/0!	3.21006	0.00232338	0.00947942	1.00:2.59:0.78:1.65:0.66:1.01:1.77:0:0:0:0:0:0:0:1.07:3.25:0:0:0:3.64:7.45:0:4.25:3.99:0:7.72:0:1.65:2.40:2.34:1.70:1.47:0:2.82:2.35:0:0:0:0:0:0:0:0:0:0:0	2790	7240	2190	4590	1840	2810	4940	0	0	0	0	0	0	0	2990	9070	0	0	0	10200	20800	0	11900	11100	0	21500	0	4610	6700	6530	4750	4090	0
N(+.98)QTILKKGKRENIVNIRKQREKAAILIQ(+.98)AV	3475.14	869.539	0.03	5.46	7	11.12		Deamidation (NQ)	10.1765	377.645	635.611	0.0269472	0.0160105	0.0030048	0.00941162	1.00:0:2.59:9.53:4.45:12.99:0:0:7.08:0:0:8.18:2.58:0:0:18.62:0:0:0:0:0:0:1.02:0:0:0:0:0:0:0:0:0:0:0:0:0:4.84:0:4.29:0:2.59:0:4.42:0:0.48:7.76	171	0	442	1620	759	2220	0	0	1210	0	0	1400	439	0	0	3180	0	0	0	0	0	0	173	0	0	0	0	0	0	0	0	0	0
KAKPKPPK	893.14	447.299	0.09	60	5.3	10.48			1950.47	0	497.811	#DIV/0!	3.91809	0.0049721	0.00920327	0:0:1.00:1.38:0.84:0:0.06:0:0:0:0:0.72:0:0:0:1.27:0.85:0:0:2.68:0:0:0:0.86:3.06:2.85:1.97:1.49:2.17:0.95:0:0.50:1.19:0:4.89:0:0:0:0:0:0:0:0:0:0:0	0	0	1470	2020	1230	0	90.6	0	0	0	0	1050	0	0	0	1860	1240	0	0	3930	0	0	0	1270	4490	4170	2890	2190	3180	1390	0	728	1750
GGGGSVCGYSGGGSGCGGGSSGGSG	1864.85	932.839	0.28	60	7.2	5.51			492.235	0	1116.39	#DIV/0!	0.440917	0.00421963	0.00919292	1.00:0.63:0.81:1.02:0.41:0:0.66:0.49:0:0:0.58:0.66:1.06:0:0.24:0.51:0.52:1.10:0.55:0:0:0.60:0:0:0.41:0:0:0.34:0.31:0.69:0.38:0.36:0.39:0:0:0:0:0:0:0:0:0:0:0:0:0	2080	1300	1670	2120	859	0	1360	1010	0	0	1200	1370	2200	0	506	1060	1070	2290	1140	0	0	1250	0	0	856	0	0	696	649	1440	795	739	803
VPPNNSNAAEDDLPTVELQGVVPR	2531.76	844.431	0.01	60	9.9	3.92			3704.12	0	352.222	#DIV/0!	10.5164	0.0209406	0.0086041	0:0:0:0:0:0:0:0:0:0:0:0:0:1.00:0.43:0:0:0:2.36:0:3.87:1.06:2.06:0:0:1.36:1.54:0:0:0:0:0:1.12:0.89:0:0:0:0:0:0:0:0:0:0:0:0	0	0	0	0	0	0	0	0	0	0	0	0	0	4420	1920	0	0	0	10400	0	17100	4670	9090	0	0	6020	6800	0	0	0	0	0	4950
EETKENEGFTVTAEGK	1768.85	590.279	0.11	60	6.6	4.33	sp|P01024|CO3_HUMAN		23645.3	0	100257	#DIV/0!	0.235846	2.91459e-05	0.0084995	1.00:1.78:0.96:0.20:0.67:0.53:0.29:0.25:0.71:0:0.44:0.13:0.10:0.03:0.10:0.17:0.05:0.08:0.25:0.01:0.07:0.05:0.20:0.10:0.07:0.07:0.07:0.08:0.05:0.16:0.13:0.06:0.06:0.06:0.18:0:0:0:0:0:0:0:0:0:0:0	241000	428000	231000	47300	162000	128000	69400	59800	172000	0	107000	32000	24300	7430	23700	40700	12800	18200	59400	2870	17600	11000	48800	23000	15800	16500	15800	19600	13200	39500	31100	14100	14500
DDPDAPLQPVTPLQLFEG	1952.15	976.481	0.09	60	6.6	3.37			3546.53	0	480.056	#DIV/0!	7.38775	0.016703	0.00845972	1.00:0:0.51:0:0.46:0:2.08:0:0:0:0:0:0:0.95:0:0:0:0.85:0.98:0.89:6.13:0:4.38:8.48:0:7.07:1.74:0.50:0:0:1.87:0.80:0:7.89:0:0:0:0:0:0:0:0:0:0:0:0	1480	0	754	0	677	0	3080	0	0	0	0	0	0	1400	0	0	0	1250	1460	1320	9060	0	6480	12500	0	10500	2580	741	0	0	2770	1180	0
LAALKKALAAAG	1097.37	549.362	0.03	60	6.2	10			2180	0	357.778	#DIV/0!	6.09317	0.00740916	0.00608446	0:0:0:0:0:1.00:0.38:0:0:0:0:0:0:0:0:0.58:0:0:0.80:2.32:0:0.34:0:0.88:0:2.07:1.40:0.75:1.33:0:0.46:0:0.94:0:0:0:0:0:0:0:0:0:0:0:0:0	0	0	0	0	0	3280	1250	0	0	0	0	0	0	0	0	1910	0	0	2620	7600	0	1120	0	2890	0	6800	4600	2470	4360	0	1500	0	3100
A(+42.01)WLLVAARALLQ(+.98)LL	1593.94	797.486	0.12	3.29	7	9.79		Acetylation (Protein N-term); Deamidation (NQ)	527.824	2652.18	2194.81	0.199015	0.240487	0.014445	0.00581413	1.00:0:17.87:5.41:0.39:20.30:0:23.63:20.55:0:7.39:11.38:25.72:25.11:6.76:0:0:20.33:0:0:6.55:0:0:4.82:0:2.00:0:2.78:16.09:6.29:0:0.71:2.94:0:0:27.48:4.54:0:0:4.81:4.62:22.64:26.37:2.99:0:43.79	213	0	3800	1150	83.6	4310	0	5020	4370	0	1570	2420	5470	5340	1440	0	0	4320	0	0	1390	0	0	1030	0	426	0	591	3420	1340	0	150	626
FGALLGLSLYGA	1181.4	591.33	0.22	60	4.7	5.52			2189.65	0	738.333	#DIV/0!	2.96566	0.0002522	0.00562681	0:0:0:0:0:1.00:0.80:0:0:0:0:0:0.43:1.07:0.43:0.78:0:0:1.44:1.51:1.00:0:0.89:1.20:0:0.90:0:0.76:1.55:1.23:0:0.30:0:0.78:1.11:0:0:0:0:0:0:0:0:0:0:0	0	0	0	0	0	2940	2350	0	0	0	0	0	1270	3160	1270	2300	0	0	4220	4450	2930	0	2610	3520	0	2640	0	2250	4570	3600	0	884	0
E(-18.01)YIIQLSKGRLVLKT	1743.13	581.69	0.15	3.14	2.9	9.7		Pyro-glu from E	5790.59	26036.4	21457.8	0.222404	0.26986	0.047863	0.00517979	0:1.00:1.43:0.73:2.20:1.18:0.09:0:1.46:0:1.07:1.26:0.32:0:1.69:1.12:0:1.04:0:0.18:0:0:0:0:0:1.27:0:0.38:1.36:0:0:0:0.53:0:0:3.02:0:0:1.78:0:2.43:0:0:0:3.60:0	0	26500	38000	19200	58300	31100	2400	0	38700	0	28200	33300	8440	0	44800	29700	0	27600	0	4840	0	0	0	0	0	33500	0	10000	36100	0	0	0	14000
GNPGLPGEPGPVGG	1204.3	602.804	0.31	5.46	4.2	4			391.765	1401.55	1310.39	0.279523	0.298968	0.00803159	0.00479629	1.60:0.54:1.84:0.78:1.17:0.51:1.19:0.79:2.88:1.00:1.46:1.46:0.68:0:0:0:0.69:0.41:1.24:0:0:0:1.28:0:0:0:0:0:0:0:0:0.76:0:0:1.52:1.40:0.87:1.39:1.48:0:2.24:2.06:1.17:0.52:0:0	2220	750	2560	1080	1620	704	1650	1100	3990	1390	2030	2020	943	0	0	0	961	569	1720	0	0	0	1780	0	0	0	0	0	0	0	0	1050	0
GPRGT	486.53	487.266	0.22	7.84	4.5	9.75			16.6471	1539.87	1325.56	0.0108107	0.0125586	0.000350236	0.00431069	0:0.83:0.32:0:0:0:0:0:0.76:1.00:0.80:0:0.34:0:0.34:0:0.43:0:0:0:0:0:0:0:0:0:0:0:0.06:0:0:0:0:0:0:0.02:0.50:0.58:0.73:0:0.44:0.75:0:0.41:0:0	0	4120	1560	0	0	0	0	0	3780	4960	3960	0	1670	0	1660	0	2150	0	0	0	0	0	0	0	0	0	0	0	283	0	0	0	0
VGGSY	481.51	482.225	0.3	60	3	5.49			60.1765	1073.73	376.278	0.0560445	0.159926	1.51754e-06	0.0042675	0.39:0.31:0.91:1.00:0.37:1.53:1.21:0.91:1.21:1.00:0:2.41:0:0:0:0:0:0:0:0:0.31:0:0.24:0:0:0:0:0.24:0.23:0:0:0.21:0:0:0.46:2.17:2.78:2.07:1.50:2.29:1.78:2.07:3.91:0:0.70:0.37	236	184	547	604	223	921	727	549	730	602	0	1450	0	0	0	0	0	0	0	0	189	0	142	0	0	0	0	146	140	0	0	128	0
GLKQ(+.98)VMAIKSRVVLPYLVPKLTTPPVN(+.98)TRVLA	3504.32	1168.71	0.05	60	9.4	11.17		Deamidation (NQ)	1393.76	100.909	189.374	13.8121	7.35986	0.0126511	0.00398095	0:0:1.00:0:0:0.00:0:0:0:0:0:0:0:0:0.90:0:0.18:0:0.38:0.66:0.21:1.14:0:1.45:0:2.53:0.25:0.98:0.66:3.61:0.62:0.55:1.14:0:0.30:0:0.67:0:0:0:0:0:0:0:0:0	0	0	1640	0	0	1.73	0	0	0	0	0	0	0	0	1480	0	287	0	621	1080	346	1870	0	2370	0	4150	410	1600	1080	5910	1010	904	1860
QSNVAAPGDATPPA	1295.37	648.313	0.21	2.86	7.3	3.8			502.294	1242.09	1402.78	0.404394	0.358071	0.00729572	0.00371519	1.00:1.03:2.05:0.84:1.16:0:0.24:0.92:2.22:0:2.03:1.10:0.68:0.27:0.48:0.84:0.97:0.59:0.64:0:0.99:0:1.14:0:0:0:0:0:0:0:0:0.74:0.79:0.74:0.52:0.67:0.92:0.42:0.58:1.00:1.11:1.80:1.06:0.48:0.24:0.60	1540	1580	3160	1290	1790	0	370	1410	3420	0	3120	1690	1040	414	735	1290	1500	901	979	0	1520	0	1760	0	0	0	0	0	0	0	0	1130	1210
RGAASKVKVPM	1143.41	1143.66	0.04	60	8.2	11.17			482.176	81	41.3333	5.9528	11.6656	0.0379876	0.00320829	0:0:0.87:0:0:0:0:0:0:1.00:0:0:0:0:0:0:0:0:0:0.28:0:2.82:4.05:0:1.75:4.29:2.17:1.72:1.48:0.46:0:0:1.58:0:0:0:0:0:0:1.96:0:0:0:0.29:0:0	0	0	347	0	0	0	0	0	0	397	0	0	0	0	0	0	0	0	0	113	0	1120	1610	0	696	1710	861	683	590	184	0	0	630
PFLRSSKIIQISSGRELRV	2186.59	1093.67	0.08	5.75	8.3	11.71			552.371	2595.09	6111.67	0.212852	0.0903797	0.0217754	0.00304709	1.00:1.01:0:0:1.14:1.41:0.27:0:1.39:0:4.49:2.12:0.68:0:0.39:2.46:4.73:1.10:0.21:0.24:0:0:0.16:0:0.76:0:0.01:0:0.07:0.11:0:0:0:0:0.33:0.35:1.01:0:0:0.25:0:1.95:0.72:0.14:0:1.35	4960	4990	0	0	5660	7010	1320	0	6890	0	22300	10500	3350	0	1960	12200	23400	5470	1030	1210	0	0	780	0	3760	0	57.3	0	358	535	0	0	0
KIGGDLPKGR	1040.23	1040.63	0.23	3.89	6.4	9.99			3082.24	1068.36	1238.44	2.88501	2.4888	0.0083297	0.00296272	1.16:0.22:0.43:0.29:0.21:0.57:0.14:0.10:0:1.00:0:0.60:1.00:0.46:0.74:1.75:0.81:0.72:2.77:0.97:3.81:2.37:0.91:0.25:1.52:0.20:2.64:0.65:0.10:1.28:0.70:1.05:1.52:1.55:1.70:0.54:1.09:0:1.04:0.37:1.03:0:0.37:0.62:0.30:0	2550	476	942	628	456	1250	308	222	0	2180	0	1320	2180	1010	1610	3810	1770	1580	6040	2110	8310	5180	1990	548	3330	442	5770	1420	218	2800	1530	2290	3320
PPPVLAK	720.91	361.243	0.21	60	4	9.18			31.4118	7020.91	2398.33	0.00447403	0.0130973	4.47684e-06	0.00262864	0:0:1.50:0:0.94:1.69:1.50:0.86:0.81:1.00:0:1.95:0:0:0:0:0:0:0:0:0:0:0:0:0:0:0:0.13:0:0:0:0:0:0:0:2.97:3.58:0.57:1.80:2.72:1.47:0.69:2.75:1.50:0.34:0	0	0	6320	0	3960	7120	6300	3630	3430	4210	0	8200	0	0	0	0	0	0	0	0	0	0	0	0	0	0	0	534	0	0	0	0	0
PGGGYGAA	648.67	649.289	0.01	60	7.5	5.95			498.941	69.7273	0	7.15561	#DIV/0!	0.0459821	0.00257053	0:0:0:0:0:0:0:0:0:0:0:0:0:0:0:0:0:0:0:0:0:0:1.00:0:0:0:0.65:0:0.64:0:0.24:1.09:0.82:1.81:1.17:0:0:0.67:0:0:0:0:0:0:0:0	0	0	0	0	0	0	0	0	0	0	0	0	0	0	0	0	0	0	0	0	0	0	1140	0	0	0	744	0	731	0	271	1250	936
TSAGLKLILK	1043.32	522.35	0.04	60	4.1	10			475.471	0	0	#DIV/0!	#DIV/0!	0.0173662	0.00248438	0:0:0:0:0:0:0:0:0:0:0:0:0:0:0:0:0:0:1.00:0:0.71:0:0.99:0:0:0:0:0.65:0.57:0.80:0:0:0.47:0:0:0:0:0:0:0:0:0:0:0:0:0	0	0	0	0	0	0	0	0	0	0	0	0	0	0	0	0	0	0	1560	0	1110	0	1540	0	0	0	0	1010	887	1240	0	0	736
IPLDLLLAVPVP	1259.59	630.395	0.07	60	4	3.8			2336.47	0	270.556	#DIV/0!	8.63583	0.00320815	0.0022587	0:0:0:0:0:0:0:0:0:0:0:0:0:0:0:1.00:0:0:1.16:0:1.07:0:0:0:0:0:0.68:0.65:1.08:0:0.80:0:0.92:1.06:0.72:0:0:0:0:0:0:0:0:0:0:0	0	0	0	0	0	0	0	0	0	0	0	0	0	0	0	4870	0	0	5670	0	5230	0	0	0	0	0	3290	3160	5280	0	3920	0	4490
E(-18.01)RSLRPYSLVRPLLV	1780.15	890.533	0.12	4.52	8.1	10.74		Pyro-glu from E	2977.94	1212.27	778.278	2.45649	3.82632	0.0428132	0.00211209	1.00:0.47:0:0.65:0:1.15:0:0.73:0:0:1.15:0:0.93:0:3.28:0.24:0:2.53:0:5.44:4.44:0:2.93:2.52:0:4.31:2.26:1.61:4.64:0.25:6.57:0:3.16:5.23:0.53:0.52:1.14:0:0:1.48:0:0.87:2.88:1.96:0.35:2.36	1150	547	0	753	0	1330	0	843	0	0	1330	0	1070	0	3790	276	0	2920	0	6270	5120	0	3370	2910	0	4970	2610	1860	5350	292	7580	0	3650
LLVLITGGK	913.17	457.32	0.06	60	5.1	8.75			2128.82	0	102.222	#DIV/0!	20.8254	0.00994386	0.00197869	0:0:0:0:1.00:0:0:0:0:0:0:0:0:0:0:0:0:0:0:0:0:0:2.54:3.25:3.34:0:3.00:0:0:1.72:2.86:0:1.41:0:1.50:0:0:0:0:0:0:0:0:0:0:0	0	0	0	0	1840	0	0	0	0	0	0	0	0	0	0	0	0	0	0	0	0	0	4680	6000	6150	0	5540	0	0	3180	5280	0	2600
KVMRLRKLAQ(+.98)QIAN	1670.04	835.506	0.01	60	7.7	12.02		Deamidation (NQ)	9186.47	629.091	699.444	14.6028	13.134	0.0120708	0.00171131	0:0:0:0:0:0:0:0:0:0:0:1.00:0:0:0:0:0:2.09:0:2.30:0:0:0:1.67:7.08:6.40:1.38:0:2.18:5.18:5.97:2.17:3.98:0:0:0:0:0:0:0:1.70:0:0:0:0:0	0	0	0	0	0	0	0	0	0	0	0	4080	0	0	0	0	0	8510	0	9390	0	0	0	6820	28800	26100	5630	0	8890	21100	24400	8840	16200
FLPLVAMVLLV	1214.62	1214.74	0.04	60	9.2	5.52			1294.94	0	100.5	#DIV/0!	12.885	0.0066445	0.00162471	0:0:0:0:0:1.00:0.92:0:0:0:0:0:0:0:0:0:0:0:6.29:0.65:2.44:2.09:1.29:2.73:1.77:1.04:0.57:1.31:0.84:0:0:0:0.61:1.71:0:0:0:0:0:0:0:0:0:0:0:0	0	0	0	0	0	943	866	0	0	0	0	0	0	0	0	0	0	0	5930	614	2300	1970	1210	2580	1670	985	536	1240	789	0	0	0	580
VFPVVIQAVVD	1185.43	1185.71	0.11	6.81	6.7	3.8	sp|O60291|MGRN1_HUMAN		1451.71	273.364	358.444	5.31053	4.05002	0.00370088	0.000798664	0:0:1.00:0.35:0.12:0.21:0.46:0:0:0:0:0.22:0:0:0.09:0.11:0:0:1.40:0.50:0.15:0.55:0.33:1.01:1.17:1.06:0.46:0.20:0:1.14:0.13:0.69:0.19:0.35:0.52:0.96:0:0:0:0.24:0:0:0:0:0:0	0	0	2510	887	313	538	1160	0	0	0	0	550	0	0	225	269	0	0	3510	1250	372	1380	822	2530	2930	2650	1160	503	0	2860	314	1730	478
KKKMKSKKK	1133.5	567.38	0.1	60	8.5	10.78			2811.18	0	353.333	#DIV/0!	7.95616	0.00169187	0.000766833	0:0:0:0:1.00:0:0:0:0:0:0:0:0:2.26:0.67:0:0:0:2.20:0:1.23:0:2.54:0.82:0:4.54:0:1.76:0:2.66:4.16:2.88:2.52:0:4.20:0:0:0:0:0:0:0:0:0:0:0	0	0	0	0	1620	0	0	0	0	0	0	0	0	3650	1090	0	0	0	3560	0	1980	0	4120	1320	0	7360	0	2850	0	4310	6740	4670	4080
VLLHRGATP	963.15	482.285	0.06	60	5.3	9.73			0	338.545	566.944	0	0	0.00246403	0.000609472	0.46:0.52:0:0:0.39:0.82:0:1.08:1.25:1.00:1.44:1.43:0:1.64:0:0:0:0:0:0:0:0:0:0:0:0:0:0:0:0:0:0:0:0:0:0.40:1.05:0:1.11:0.28:0:0:0:0.50:0.31:0	468	531	0	0	402	834	0	1100	1270	1020	1460	1450	0	1670	0	0	0	0	0	0	0	0	0	0	0	0	0	0	0	0	0	0	0
GVRVGALLLLGVL	1279.63	640.428	0.22	60	7.2	9.75			3064.82	0	891.111	#DIV/0!	3.43933	1.88816e-05	0.000543519	0:0:0:1.00:0:0.77:1.55:0:0:0:0:0:0:1.01:0.71:1.64:0:0:1.19:2.12:0:0:0:1.59:1.70:0.29:1.83:1.20:1.74:1.40:1.01:1.36:1.43:2.02:2.79:0:0:0:0:0:0:0:0:0:0:0	0	0	0	2410	0	1840	3720	0	0	0	0	0	0	2420	1710	3940	0	0	2860	5100	0	0	0	3820	4080	702	4410	2880	4190	3360	2420	3280	3430
MVLKIIAFKPK	1287.71	644.409	0.12	60	4.2	10.3			1887.41	0	318.222	#DIV/0!	5.93111	0.000307698	0.000233599	0:0:0:0:1.00:0.90:0:0:0:0:0:0:0:0:1.33:2.48:2.47:0:2.48:4.24:2.27:3.23:0:6.64:0:0:1.30:1.79:3.67:2.44:0:5.46:1.82:4.95:5.58:0:0:0:0:0:0:0:0:0:0:0	0	0	0	0	699	631	0	0	0	0	0	0	0	0	928	1740	1730	0	1730	2970	1590	2260	0	4640	0	0	906	1250	2570	1710	0	3820	1280
NPGGDFGKKELSP	1345.47	673.34	0.16	60	5.5	6.07			2638.82	0	9326.11	#DIV/0!	0.28295	0.0375264	0.000196886	1.00:1.03:1.38:0.85:0:1.29:0.62:0.78:2.87:0:1.95:2.32:1.70:1.17:1.08:1.92:1.87:1.80:0.87:0:0:1.14:0:0:1.48:0:0:0.51:0.33:0:0:0:0.38:0:1.61:0:0:0:0:0:0:0:0:0:0:0	7100	7320	9820	6060	0	9140	4400	5560	20400	0	13800	16500	12100	8320	7650	13600	13300	12800	6210	0	0	8080	0	0	10500	0	0	3630	2320	0	0	0	2720
NDN(+.98)EEGFFSA	1130.08	565.717	0.15	60	8.3	3.57	sp|P02675|FIBB_HUMAN	Deamidation (NQ)	2907.06	0	11348.3	#DIV/0!	0.256166	0.01766	0.000146939	1.00:2.25:2.83:1.30:1.37:1.23:1.96:1.21:2.37:0:3.17:3.49:2.95:0:0:1.09:2.89:2.30:1.72:0.25:0:0.75:0:0:1.22:0:0:1.20:0:1.27:0.20:0.76:0.23:0:0:0:0:0:0:0:0:0:0:0:0:0	6500	14700	18400	8460	8910	8000	12700	7890	15400	0	20600	22700	19200	0	0	7110	18800	14900	11200	1600	0	4880	0	0	7950	0	0	7790	0	8260	1280	4940	1520
KKESKKKTLKN	1331.62	666.42	0.07	60	7.1	10.3			928.412	18.0909	214.389	51.3192	4.3305	1.30313e-06	4.37353e-05	0:0:0:0:1.00:1.07:0:0:0:0:0:0:0:1.52:2.37:0:0.34:0:2.08:2.48:1.59:1.15:1.31:1.02:0:1.89:2.03:0.62:2.11:1.70:1.19:0:1.72:2.31:2.57:0:0:0:0:0:0:0:0:0:0.33:0	0	0	0	0	613	657	0	0	0	0	0	0	0	930	1450	0	209	0	1270	1520	975	706	804	627	0	1160	1240	380	1290	1040	731	0	1050
QVLKIIATFK	1160.47	580.88	0.26	60	8.7	10			7456.47	0	2041.11	#DIV/0!	3.65314	4.52295e-07	1.82365e-05	1.00:5.51:0:3.97:13.91:0:19.58:0:0:0:0.42:2.14:0:17.04:19.47:14.49:5.46:0:24.99:41.90:18.02:6.97:27.24:26.83:23.09:31.55:32.15:0:10.96:11.34:25.44:14.55:19.67:15.92:24.68:0:0:0:0:0:0:0:0:0:0:0	357	1970	0	1420	4960	0	6980	0	0	0	151	762	0	6080	6940	5170	1950	0	8910	14900	6430	2480	9710	9570	8240	11300	11500	0	3910	4050	9070	5190	7020
DSGGQEAN(+.98)N(+.98)PN(+.98)CCNCI	1641.66	547.853	0.17	60	6.8	3.67		Deamidation (NQ)	7084.71	0	709.333	#DIV/0!	9.98784	1.30176e-05	1.96795e-06	0:0:1.00:0.11:0.61:0:0:0:0:0:0:0.08:0:0.18:0:0:0:0:1.52:0.94:1.18:0.81:0:0:1.27:2.13:0.84:0.62:1.48:1.10:2.10:1.38:1.33:1.89:0:0:0:0:0:0:0:0:0:0:0:0	0	0	6470	686	3930	0	0	0	0	0	0	502	0	1180	0	0	0	0	9840	6060	7660	5240	0	0	8250	13800	5420	4000	9580	7140	13600	8930	8620
[truncated: 13 more columns]
